# Supplementary material for: Synthesis of gem-difluoromethylenated analogues of boronolide
Source: publisher site journal article supplement (doi:10.3762/bjoc.6.37), 2010-04-20
Supplement: Additional file 1 [file 1860-5397-6-37-S1.pdf]

**Supporting Information**

for

**Synthesis of *gem*-difluoromethylenated analogues of  
boronolide**

Jing Lin<sup>1</sup>, Xiao-Long Qiu<sup>2</sup> and Feng-Ling Qing\*<sup>1,2</sup>

Address: <sup>1</sup>College of Chemistry, Chemical Engineering and Biotechnology, Donghua University, 2999 North Renmin Lu, Shanghai 201620, China and <sup>2</sup>Key Laboratory of Organofluorine Chemistry, Shanghai Institute of Organic Chemistry, Chinese Academy of Sciences, 345 Lingling Lu, Shanghai 200032, China

Email: Feng-Ling Qing - [flq@mail.sioc.ac.cn](mailto:flq@mail.sioc.ac.cn)

\* Corresponding author

## Experimental section

Unless otherwise indicated, all chemicals and solvents were used as received from commercial sources or purified by standard procedures. Optical rotations were recorded on a Jasco P-1030 polarimeter. IR spectra were scanned with a Bio-Rad FTS185 spectrophotometer.  $^1\text{H}$  and  $^{13}\text{C}$  NMR spectra were obtained using a Bruker AM300 and a Bruker AM400 spectrometer, respectively.  $^{19}\text{F}$  NMR spectra were recorded on a Bruker AM300 spectrometer ( $\text{CFCl}_3$  as external standard and low field is positive; chemical shifts ( $\delta$ ) are given in ppm and coupling constants ( $J$ ) in Hz). LRMS were measured on an Agilent system mass spectrometer and HRMS on an APEXIII (7.0 Tesla) FTMS or Waters mass spectrometer. Elemental analyses were performed on a Vario EL III elementary analysis instrument.

**(*S*)-5-(*tert*-Butyldimethylsilyloxy)-1-((2*S*,3*S*)-3-((*S*)-1-(*tert*-butyldimethylsilyloxy)pentyl)-2,2-dimethyl-1,3-dioxolan-4-yl)-2,2-difluoropent-3-yn-1-ol (12a) and (*R*)-5-(*tert*-butyldimethylsilyloxy)-1-((2*S*,3*S*)-3-((*S*)-1-(*tert*-butyldimethylsilyloxy)pentyl)-2,2-dimethyl-1,3-dioxolan-4-yl)-2,2-difluoropent-3-yn-1-ol (12b)**

To a stirred suspension of compound **9** and compound **11** (1.2 g, 4.01 mmol) in THF– $\text{H}_2\text{O}$  (50 mL, 1:4, v/v), indium powder (400 mg, 3.48 mmol) was added at room temperature. After stirring for 22 h, the reaction mixture was quenched with 1 M HCl. The aqueous phase was extracted with EtOAc, the organic phase washed successively with water and brine, dried over anhydrous  $\text{Na}_2\text{SO}_4$ , filtered and concentrated. The residue was purified by flash chromatography on silica gel (petroleum ether/ethyl acetate = 50:1) to afford **12a** (0.8 g, 48% yield) and **12b** (0.5 g, 30% yield).

**12a**: yellow oil;  $[\alpha]_{\text{D}}^{27} = -3.2$  ( $c$  1.00,  $\text{CHCl}_3$ );  $^1\text{H}$  NMR (300 MHz,  $\text{CDCl}_3$ )  $\delta$  4.40 (t,  $J = 4.8$  Hz, 2H), 4.18 (t,  $J = 7.8$  Hz, 1H), 4.05 (dd,  $J = 7.5$  Hz, 3.0 Hz, 1H), 3.92 (m, 1H), 3.84 (m, 1H), 1.75 (m, 1H), 1.50 (m, 1H), 1.47 (s, 3H), 1.43 (s, 3H), 1.34 (m, 4H), 0.91 (m, 21H), 0.13 (s, 12H);  $^{13}\text{C}$  NMR (100 MHz,  $\text{CDCl}_3$ )  $\delta$  113.4 (t,  $J = 236.6$  Hz), 109.7, 87.7, 81.6, 75.5 (t,  $J = 38.5$  Hz), 74.9, 74.4 (t,  $J = 28.2$  Hz), 71.8, 51.3, 32.6, 28.4, 26.9, 25.9, 25.7, 22.8, 18.2, 18.1, 14.0, -4.5, -4.7, -5.2;  $^{19}\text{F}$  NMR (282 MHz,  $\text{CDCl}_3$ )  $\delta$  -92.1 (dm,  $J = 280.3$  Hz, 1F), -94.1 (dm,  $J = 286.2$  Hz, 1F); IR (thin film)  $\nu_{\text{max}}$  3450, 2958, 2260, 1473, 1386, 1256, 837  $\text{cm}^{-1}$ ; MS (ESI)  $m/z$  551 ( $\text{M}+\text{H}$ ) $^+$ ; HRMS Calcd for  $\text{C}_{27}\text{H}_{52}\text{F}_2\text{O}_5\text{Si}_2\text{Na}$ : 573.3214; found: 573.3224.

**12b**: yellow oil;  $[\alpha]_D^{27} = -3.3$  ( $c$  1.00,  $\text{CHCl}_3$ );  $^1\text{H}$  NMR (300 MHz,  $\text{CDCl}_3$ )  $\delta$  4.40 (t,  $J = 4.8$  Hz, 2H), 4.29 (d,  $J = 8.1$  Hz, 1H), 4.00 (dd,  $J = 9.0$  Hz, 4.2 Hz, 1H), 3.82 (m, 2H), 1.65 (m, 1H), 1.44 (s, 6H), 1.36 (m, 5H), 0.92 (m, 21H), 0.14 (s, 6H), 0.08 (s, 6H);  $^{13}\text{C}$  NMR (100 MHz,  $\text{CDCl}_3$ )  $\delta$  113.1 (t,  $J = 237.5$  Hz), 110.1, 88.1, 79.5, 75.8 (t,  $J = 38.9$  Hz), 73.2, 71.7 (t,  $J = 28.2$  Hz), 51.2, 32.4, 28.0, 27.3, 26.8, 25.9, 25.7, 22.7, 18.2, 18.1, 14.0, -4.3, -4.7, -5.3;  $^{19}\text{F}$  NMR (282 MHz,  $\text{CDCl}_3$ )  $\delta$  -94.2 (dm,  $J = 276.9$  Hz, 1F), -96.3 (dm,  $J = 275.8$  Hz, 1F); IR (thin film)  $\nu_{\text{max}}$  3350, 2933, 2258, 1478, 1386, 1256, 836  $\text{cm}^{-1}$ ; MS (ESI)  $m/z$  551 ( $\text{M}+\text{H}$ ) $^+$ ; HRMS Calcd for  $\text{C}_{27}\text{H}_{52}\text{F}_2\text{O}_5\text{Si}_2\text{Na}$ : 573.3214; found: 573.3237.

**(*S,Z*)-5-(*tert*-Butyldimethylsilyloxy)-1-((4*R*,5*S*)-5-((*R*)-1-(*tert*-butyldimethylsilyloxy)-pentyl)-2,2-dimethyl-1,3-dioxolan-4-yl)-2,2-difluoropent-3-en-1-ol (13a)**

To a solution of Pd-BaSO<sub>4</sub> (42 mg, 42 mg/mmol) in MeOH (15 mL), a solution of quinoline (42 mg, 42 mg/mmol) in MeOH (2 mL) was added at 0 °C. After warming to room temperature, the suspension was stirred for 15 min before compound **12a** (550 mg, 1.00 mmol) in DMF (10 mL) was added. After stirring for another 7 h at 35 °C under hydrogen atmosphere (1 atm),  $^{19}\text{F}$  NMR indicated the absence of the starting material **12a**. The reaction mixture was filtered and concentrated. The residue was purified by flash chromatography on silica gel (petroleum ether/ethyl acetate = 50:1) to afford compound **13a** (0.53 g, 96% yield) as a yellow oil.

$[\alpha]_D^{27} = -4.0$  ( $c$  1.00,  $\text{CHCl}_3$ );  $^1\text{H}$  NMR (300 MHz,  $\text{CDCl}_3$ )  $\delta$  5.95 (m, 1H), 5.60 (m, 1H), 4.47 (m, 2H), 4.06 (t,  $J = 7.5$  Hz, 1H), 3.98 (dd,  $J = 8.1$  Hz, 3.0 Hz, 1H), 3.88 (m, 1H), 3.78 (dt,  $J = 10.5$  Hz, 8.7 Hz, 1H), 1.69 (m, 1H), 1.47 (m, 1H), 1.41 (s, 3H), 1.39 (s, 3H) 1.30 (m, 4H), 0.90 (m, 21H), 0.13 (s, 6H), 0.07 (s, 6H);  $^{19}\text{F}$  NMR (282 MHz,  $\text{CDCl}_3$ )  $\delta$  -101.5 (dt,  $J = 259.4$  Hz, 11.2 Hz, 1F), -103.9 (dt,  $J = 255.8$  Hz, 11.8 Hz, 1F); IR (thin film)  $\nu_{\text{max}}$  3350, 2958, 2860, 1469, 1383, 1256, 1084, 837, 776  $\text{cm}^{-1}$ ; MS (ESI)  $m/z$  553 ( $\text{M}+\text{H}$ ) $^+$ ; Anal. Calcd for  $\text{C}_{24}\text{H}_{46}\text{F}_2\text{O}_4\text{Si}$ : C, 58.65; H, 9.84; found: C, 58.73; H, 9.76.

**(*R,Z*)-5-(*tert*-Butyldimethylsilyloxy)-1-((4*R*,5*S*)-5-((*R*)-1-(*tert*-butyldimethylsilyloxy)-pentyl)-2,2-dimethyl-1,3-dioxolan-4-yl)-2,2-difluoropent-3-en-1-ol (13b)**

To a solution of Pd-BaSO<sub>4</sub> (34 mg, 42 mg/mmol) in MeOH (15 mL), a solution of quinoline (34 mg, 42 mg/mmol) in MeOH (2 mL) was added at 0 °C. After warming to room temperature, the suspension was stirred for 15 min before compound **12b** (440 mg, 0.80 mmol) in DMF (10 mL) was added. After stirring for another 3.5 h at 35 °C under hydrogen atmosphere,  $^{19}\text{F}$  NMR indicated the absence of the starting material **12b**. The reaction mixture

was filtered and concentrated. The residue was purified by flash chromatography on silica gel (petroleum ether/ethyl acetate = 20:1) to afford compound **13b** (0.41 g, 92% yield) as a yellow oil.

$[\alpha]_{\text{D}}^{27} = -6.1$  ( $c$  1.00,  $\text{CHCl}_3$ );  $^1\text{H NMR}$  (300 MHz,  $\text{CDCl}_3$ )  $\delta$  5.98 (m, 1H), 5.51 (m, 1H), 4.47 (m, 2H), 4.21 (d,  $J = 8.7$  Hz, 1H), 3.98 (dd,  $J = 8.7$  Hz, 4.2 Hz, 1H), 3.75 (m, 2H), 1.63 (m, 1H), 1.42 (s, 6H), 1.35 (m, 5H), 0.90 (m, 21H), 0.08 (s, 12H);  $^{19}\text{F NMR}$  (282 MHz,  $\text{CDCl}_3$ )  $\delta$  -101.8 (dt,  $J = 251.3$  Hz, 12.4 Hz, 1F), -103.8 (dt,  $J = 259.4$  Hz, 12.1 Hz, 1F); IR (thin film)  $\nu_{\text{max}}$  3350, 2958, 2860, 1472, 1382, 1255, 1082, 837, 775  $\text{cm}^{-1}$ ; MS (ESI)  $m/z$  553 ( $\text{M}+\text{H}$ ) $^+$ ; Anal. Calcd for  $\text{C}_{24}\text{H}_{46}\text{F}_2\text{O}_4\text{Si}$ : C, 58.65; H, 9.84; found: C, 58.97; H, 9.84.

**(*S,Z*)-5-((4*R*,5*S*)-5-((*R*)-1-(*tert*-Butyldimethylsilyloxy)pentyl)-2,2-dimethyl-1,3-dioxolan-4-yl)-4,4-difluoropent-2-ene-1,5-diol (**14a**)**

To a solution of **13a** (440 mg, 0.80 mmol) in MeOH (20 mL), CSA (9 mg, 0.02 mmol) was added. After stirring for 1 h, the reaction mixture was quenched with saturated  $\text{NaHCO}_3$ . The aqueous phase was extracted with EtOAc, organic phase washed with brine, dried over anhydrous  $\text{Na}_2\text{SO}_4$ , filtered, concentrated and purified by flash chromatography on silica gel (petroleum ether/ethyl acetate = 4:1) to give **14a** (279 mg, 80% yield) as a clear oil.

$[\alpha]_{\text{D}}^{27} = -6.5^\circ$  ( $c$  1.00,  $\text{CHCl}_3$ );  $^1\text{H NMR}$  (300 MHz,  $\text{CDCl}_3$ )  $\delta$  6.08 (m, 1H), 5.68 (m, 1H), 4.37 (m, 2H), 4.04 (t,  $J = 7.5$  Hz, 1H), 3.99 (m, 1H), 3.93 (m, 1H), 3.80 (dt,  $J = 10.2$  Hz, 7.8 Hz, 1H), 2.29 (brs, 2H), 1.72 (m, 1H), 1.46 (m, 2H), 1.41 (s, 3H), 1.40 (s, 3H), 1.33 (m, 3H), 0.91 (m, 12H), 0.13 (s, 6H);  $^{19}\text{F NMR}$  (282 MHz,  $\text{CDCl}_3$ )  $\delta$  -100.4 (dd,  $J = 258.0$  Hz, 16.6 Hz, 1F), -103.5 (ddd,  $J = 255.8$  Hz, 16.1 Hz, 8.7 Hz, 1F); IR (thin film)  $\nu_{\text{max}}$  3403, 2960, 2862, 1469, 1371, 1256, 1075, 837, 776  $\text{cm}^{-1}$ ; MS (ESI)  $m/z$  461 ( $\text{M}+\text{Na}$ ) $^+$ ; Anal. Calcd for  $\text{C}_{24}\text{H}_{46}\text{F}_2\text{O}_4\text{Si}$ : C, 57.50; H, 9.19; found: C, 57.57; H, 8.93.

**(*R,Z*)-5-((4*R*,5*S*)-5-((*R*)-1-(*tert*-Butyldimethylsilyloxy)pentyl)-2,2-dimethyl-1,3-dioxolan-4-yl)-4,4-difluoropent-2-ene-1,5-diol (**14b**)**

Compound **14b** was prepared from compound **13b** (415 mg, 0.75 mmol) using the same conditions as described for compound **14a**; yield: 273 mg (83%); clear oil.

$[\alpha]_{\text{D}}^{27} = -8.2$  ( $c$  1.00,  $\text{CHCl}_3$ );  $^1\text{H NMR}$  (300 MHz,  $\text{CDCl}_3$ )  $\delta$  6.07 (m, 1H), 5.60 (m, 1H), 4.40 (m, 2H), 4.24 (d,  $J = 8.4$  Hz, 1H), 3.99 (dd,  $J = 8.7$  Hz, 3.9 Hz, 1H), 3.80 (m, 2H), 2.16 (brs, 2H), 1.64 (m, 1H), 1.43 (s, 6H), 1.35 (m, 5H), 0.90 (m, 12H), 0.08 (s, 6H);  $^{13}\text{C NMR}$  (100 MHz,  $\text{CDCl}_3$ )  $\delta$  138.4, 121.8 (t,  $J = 26.0$  Hz), 120.2 (t,  $J = 243.8$  Hz), 109.5, 78.8, 72.7, 71.1, 70.6 (t,  $J = 29.8$  Hz), 58.5, 32.1, 27.6, 26.8, 26.4, 25.4, 22.3, 17.6, 13.5, -4.8, -5.0;  $^{19}\text{F NMR}$

(282 MHz, CDCl<sub>3</sub>)  $\delta$  -101.8 (ddd,  $J$  = 256.6 Hz, 15.5 Hz, 8.7 Hz, 1F), -103.8 (dt,  $J$  = 258.0 Hz, 15.8 Hz, 1F); IR (thin film)  $\nu_{\max}$  3350, 2958, 2860, 1469, 1383, 1256, 1084, 837, 776 cm<sup>-1</sup>; MS (ESI)  $m/z$  461 (M+Na)<sup>+</sup>; HRMS Calcd for C<sub>21</sub>H<sub>40</sub>F<sub>2</sub>O<sub>5</sub>SiNa: 461.2505; found: 461.2486.

**(S)-6-((4S,5S)-5-((R)-1-(tert-Butyldimethylsilyloxy)pentyl)-2,2-dimethyl-1,3-dioxolan-4-yl)-5,5-difluoro-5,6-dihydropyran-2-one (15a)**

To a solution of **14a** (230 mg, 0.53 mmol) in CH<sub>2</sub>Cl<sub>2</sub> (15 mL), BAIB (508 mg, 1.57 mmol) and TEMPO (16 mg, 20 mol %) was added at room temperature. After stirring for 3 h, the reaction mixture was quenched with saturated aqueous Na<sub>2</sub>S<sub>2</sub>O<sub>3</sub> and extracted with CH<sub>2</sub>Cl<sub>2</sub>. The combined organic extracts were washed successively with saturated NaHCO<sub>3</sub> and brine, dried over anhydrous Na<sub>2</sub>SO<sub>4</sub>, filtered and concentrated. The residue was purified by flash chromatography on silica gel (petroleum ether/ethyl acetate = 20:1) to afford **15a** (184 mg, 80% yield) as a white solid, mp = 88–90 °C.

$[\alpha]_{\text{D}}^{27}$  = 60.7 ( $c$  1.00, CHCl<sub>3</sub>); <sup>1</sup>H NMR (300 MHz, CDCl<sub>3</sub>)  $\delta$  6.81 (m, 1H), 6.31 (d,  $J$  = 10.5 Hz, 1H), 4.60 (dt,  $J$  = 18.6 Hz, 6.3 Hz, 1H), 4.58 (t,  $J$  = 6.3 Hz, 1H), 4.25 (dd,  $J$  = 6.0 Hz, 1.5 Hz, 1H), 3.78 (m, 1H), 1.75 (m, 1H), 1.55 (m, 1H), 1.48 (s, 3H), 1.43 (s, 3H), 1.34 (m, 4H), 0.91 (m, 12H), 0.09 (s, 3H), 0.06 (s, 3H); <sup>13</sup>C NMR (100 MHz, CDCl<sub>3</sub>)  $\delta$  159.4, 138.1 (dd,  $J$  = 41.7 Hz, 34.6 Hz), 126.1 (t,  $J$  = 12.7 Hz), 112.2 (t,  $J$  = 324.6 Hz), 110.9, 80.4, 79.8 (t,  $J$  = 37.5 Hz), 72.8, 71.6, 34.1, 27.7, 27.4, 27.1, 25.9, 22.9, 18.2, 14.0, -4.1, -4.8; <sup>19</sup>F NMR (282 MHz, CDCl<sub>3</sub>)  $\delta$  -106.1 (dd,  $J$  = 292.2 Hz, 18.1 Hz, 1F), -107.9 (dd,  $J$  = 293.2 Hz, 6.2 Hz, 1F); IR (thin film)  $\nu_{\max}$  2933, 2860, 1757, 1653, 1460, 1384, 1255, 834, 777 cm<sup>-1</sup>; MS (ESI)  $m/z$  435 (M+H)<sup>+</sup>, 457 (M+Na)<sup>+</sup>; HRMS Calcd for C<sub>21</sub>H<sub>34</sub>F<sub>2</sub>O<sub>5</sub>SiNa: 457.2192; found: 457.2179.

**(R)-6-((4S,5S)-5-((R)-1-(tert-Butyldimethylsilyloxy)pentyl)-2,2-dimethyl-1,3-dioxolan-4-yl)-5,5-difluoro-5,6-dihydropyran-2-one (15b)**

Compound **15b** was prepared from compound **14b** (150 mg, 0.34 mmol) using the same conditions as described for compound **15a**; yield: 126 mg (85%); clear oil.

$[\alpha]_{\text{D}}^{27}$  = 66.8 ( $c$  1.00, CHCl<sub>3</sub>); <sup>1</sup>H NMR (300 MHz, CDCl<sub>3</sub>)  $\delta$  6.67 (m, 1H), 6.28 (d,  $J$  = 9.9 Hz, 1H), 4.81 (d,  $J$  = 15.0 Hz, 1H), 4.31 (dd,  $J$  = 9.0 Hz, 2.4 Hz, 1H), 4.21 (dd,  $J$  = 9.0 Hz, 4.2 Hz, 1H), 3.90 (dt,  $J$  = 8.1 Hz, 3.9 Hz, 1H), 1.70 (m, 1H), 1.46–1.31 (m, 11H), 0.91 (m, 12H), 0.11 (s, 3H), 0.10 (s, 3H); <sup>19</sup>F NMR (282 MHz, CDCl<sub>3</sub>)  $\delta$  -85.2 (dd,  $J$  = 291.3 Hz, 14.4 Hz, 1F), -113.1 (dd,  $J$  = 290.7 Hz, 8.5 Hz, 1F); IR (thin film)  $\nu_{\max}$  2934, 2857, 1755,

1460, 1384, 1252, 834, 777  $\text{cm}^{-1}$ ; MS (ESI)  $m/z$  435 ( $\text{M}+\text{H}$ )<sup>+</sup>, 457 ( $\text{M}+\text{Na}$ )<sup>+</sup>; Anal. Calcd for  $\text{C}_{24}\text{H}_{46}\text{F}_2\text{O}_4\text{Si}$ : C, 58.04; H, 8.35; found: C, 58.51; H, 8.40.

**(S)-5,5-Difluoro-6-((1S,2R,3S)-1,2,3-trihydroxyheptyl)-5,6-dihydropyran-2-one (5)**

To a solution of **15a** (120 mg, 0.28 mmol) in THF (10 mL), HCl (6 M, 5 mL) was added at room temperature. After the absence of the starting material, the reaction was quenched with saturated aqueous  $\text{NaHCO}_3$ . The aqueous phase was extracted with EtOAc, the organic phase washed with brine, dried over anhydrous  $\text{Na}_2\text{SO}_4$ , filtered, concentrated and purified by flash chromatography on silica gel (petroleum ether/ethyl acetate = 1:1) to afford **5** (70 mg, 90% yield) as a white solid, mp = 88–90 °C.

$[\alpha]_{\text{D}}^{28} = 44.3^\circ$  ( $c$  0.50,  $\text{CHCl}_3$ );  $^1\text{H}$  NMR (300 MHz,  $\text{CDCl}_3$ )  $\delta$  6.82 (m, 1H), 6.32 (d,  $J = 9.9$  Hz, 1H), 4.75 (dt,  $J = 19.8$  Hz, 8.4 Hz, 1H), 4.23 (d,  $J = 8.1$  Hz, 1H), 3.84 (m, 2H), 2.57 (brs, 3H), 1.60 (m, 2H), 1.41 (m, 4H), 0.93 (t,  $J = 6.6$  Hz, 3H);  $^{13}\text{C}$  NMR (100 MHz,  $\text{CDCl}_3$ )  $\delta$  159.9, 138.3 (dd,  $J = 33.3$  Hz, 25.0 Hz), 125.8 (t,  $J = 9.3$  Hz), 112.8 (t,  $J = 244.4$  Hz), 76.5 (t,  $J = 32.8$  Hz), 73.8, 70.5, 70.1, 33.2, 27.5, 22.5, 14.0;  $^{19}\text{F}$  NMR (282 MHz,  $\text{CDCl}_3$ )  $\delta$  -106.5 (dt,  $J = 292.2$  Hz, 8.2 Hz, 1F), -108.5 (dd,  $J = 293.0$  Hz, 19.5 Hz, 1F); IR (thin film)  $\nu_{\text{max}}$  2933, 2860, 1757, 1653, 1460, 1384, 1255, 834, 777  $\text{cm}^{-1}$ ; MS (ESI)  $m/z$  298 ( $\text{M}+\text{NH}_4$ )<sup>+</sup>, 335 ( $\text{M}+\text{Na}+\text{CH}_3\text{OH}$ )<sup>+</sup>; HRMS Calcd for  $\text{C}_{12}\text{H}_{18}\text{F}_2\text{O}_5\text{Na}$ : 303.1015; found: 303.1021.

**(R)-5,5-Difluoro-6-((1S,2R,3S)-1,2,3-trihydroxyheptyl)-5,6-dihydropyran-2-one (7)**

Compound **7** was prepared from compound **15b** (100 mg, 0.23 mmol) using the same conditions as described for compound **15a**; yield: 60 mg (93%); clear oil.

$[\alpha]_{\text{D}}^{27} = -10.6$  ( $c$  0.50,  $\text{CHCl}_3$ );  $^1\text{H}$  NMR (300 MHz,  $\text{CDCl}_3$ )  $\delta$  6.77 (m, 1H), 6.33 (d,  $J = 9.9$  Hz, 1H), 4.81 (ddd,  $J = 14.4$  Hz, 8.4 Hz, 5.1 Hz, 1H), 4.20 (m, 1H), 3.80 (m, 1H), 3.70 (m, 1H), 2.91 (brs, 3H), 1.57 (m, 2H), 1.35 (m, 4H), 0.92 (t,  $J = 6.6$  Hz, 3H);  $^{13}\text{C}$  NMR (100 MHz,  $\text{CDCl}_3$ ):  $\delta$  160.2, 137.2 (dd,  $J = 40.2$  Hz, 36.2 Hz), 126.5 (t,  $J = 10.8$  Hz), 112.2 (dd,  $J = 324.3$  Hz, 317.0 Hz), 79.5 (dd,  $J = 42.8$  Hz, 37.0 Hz), 72.7, 72.0, 70.5, 33.3, 27.7, 22.5, 14.0;  $^{19}\text{F}$  NMR (282 MHz,  $\text{CDCl}_3$ )  $\delta$  -98.6 (dd,  $J = 289.6$  Hz, 8.3 Hz, 1F), -109.5 (ddd,  $J = 290.7$  Hz, 14.7 Hz, 4.2 Hz, 1F); IR (thin film)  $\nu_{\text{max}}$  2933, 2860, 1757, 1653, 1460, 1384, 1255, 834, 777  $\text{cm}^{-1}$ ; MS (ESI)  $m/z$  298 ( $\text{M}+\text{NH}_4$ )<sup>+</sup>, 335 ( $\text{M}+\text{Na}+\text{CH}_3\text{OH}$ )<sup>+</sup>; HRMS Calcd for  $\text{C}_{12}\text{H}_{18}\text{F}_2\text{O}_5\text{Na}$ : 303.1015; found: 303.1017.

#### ***gem*-Difluoromethylenated boronolide (4)**

To a solution of **5** (30 mg, 0.11 mmol) in CH<sub>2</sub>Cl<sub>2</sub> (3 mL), Et<sub>3</sub>N (0.2 mL, 1.6 mmol), DMAP (3.9 mg, 0.033 mmol) followed by Ac<sub>2</sub>O (55 mg, 0.55 mmol) was added at 0 °C. The resulting mixture was warmed to room temperature and stirred overnight. The reaction was quenched with a saturated NaHCO<sub>3</sub> solution and extracted with CH<sub>2</sub>Cl<sub>2</sub>. The organic layer was washed with brine, dried over anhydrous Na<sub>2</sub>SO<sub>4</sub>, filtered and concentrated. The residue was purified by flash chromatography on silica gel (petroleum ether/ethyl acetate = 4:1) to afford compound **4** (37 mg, 85% yield) as a white solid, mp = 93–94 °C.

$[\alpha]_D^{22} = 7.4$  (*c* 0.50, CHCl<sub>3</sub>); <sup>1</sup>H NMR (300 MHz, CDCl<sub>3</sub>) δ 6.77 (m, 1H), 6.31 (d, *J* = 10.5 Hz, 1H), 5.61 (dd, *J* = 7.8 Hz, 3.3 Hz, 1H), 5.45 (dd, *J* = 6.9 Hz, 3.3 Hz, 1H), 5.05 (m, 1H), 4.70 (ddd, *J* = 15.0 Hz, 9.6 Hz, 8.1 Hz, 1H), 2.14 (s, 3H), 2.12 (s, 3H), 2.07 (s, 3H), 1.28 (m, 6H), 0.89 (t, *J* = 7.2 Hz, 3H); <sup>13</sup>C NMR (100 MHz, CDCl<sub>3</sub>) δ 170.4, 169.7, 169.0, 158.4, 137.7 (dd, *J* = 29.7 Hz, 27.4 Hz), 126.1 (t, *J* = 9.3 Hz), 112.2 (t, *J* = 242.2 Hz), 75.8 (t, *J* = 27.5 Hz), 71.5, 71.6, 66.5, 30.1, 27.0, 22.3, 20.8, 20.5, 13.8; <sup>19</sup>F NMR (282 MHz, CDCl<sub>3</sub>) δ –106.6 to –106.7 (m, 2F); IR (thin film)  $\nu_{\max}$  2923, 1785, 1650, 1374, 1067 cm<sup>-1</sup>; MS (ESI) *m/z* 461 (M+ Na+CH<sub>3</sub>OH)<sup>+</sup>; HRMS Calcd for C<sub>18</sub>H<sub>24</sub>F<sub>2</sub>O<sub>8</sub>Na: 429.1332; found: 429.1347.

#### ***5-epi-gem*-Difluoromethylenated boronolide (6)**

Compound **6** was prepared from compound **7** (25 mg, 0.09 mmol) using the same conditions as described for compound **4**; yield: 30 mg (83%); clear oil.

$[\alpha]_D^{24} = -46.1$  (*c* 0.85, CHCl<sub>3</sub>); <sup>1</sup>H NMR (300 MHz, CDCl<sub>3</sub>) δ 6.73 (m, 1H), 6.32 (d, *J* = 10.2 Hz, 1H), 5.59 (d, *J* = 6.6 Hz, 1H), 5.43 (dd, *J* = 6.9 Hz, 3.6 Hz, 1H), 5.11 (m, 1H), 4.91 (m, 1H), 2.11 (s, 6H), 2.06 (s, 3H), 1.27 (m, 6H), 0.87 (t, *J* = 7.2 Hz, 3H); <sup>13</sup>C NMR (100 MHz, CDCl<sub>3</sub>) δ 170.6, 169.7, 168.9, 158.9, 136.6 (t, *J* = 28.3 Hz), 126.4 (t, *J* = 9.9 Hz), 111.8 (t, *J* = 238.2 Hz), 76.4 (dd, *J* = 32.7 Hz, 26.0 Hz), 71.6, 71.0, 66.1, 30.3, 27.0, 22.2, 20.6, 20.4, 13.7; <sup>19</sup>F NMR (282 MHz, CDCl<sub>3</sub>) δ –100.1 (dt, *J* = 292.2 Hz, 9.0 Hz, 1F), –110.1 (ddd, *J* = 291.0 Hz, 14.1 Hz, 4.5 Hz, 1F); IR (thin film)  $\nu_{\max}$  2961, 1753, 1559, 1375, 1221 cm<sup>-1</sup>; MS (ESI) *m/z* 461 (M+Na+CH<sub>3</sub>OH)<sup>+</sup>; HRMS Calcd for C<sub>19</sub>H<sub>28</sub>F<sub>2</sub>O<sub>9</sub>Na: 461.1594; found: 461.1602.
